# Supplementary material for: Metabolite identification and pharmacokinetic study of platycodi radix (Jiegeng) in vivo
Source: Royal Society of Chemistry journal article supplement (doi:10.1039/c7ra04814a), 2017-01-01
Supplement: c7ra04814a1.pdf [file c7ra04814a1.pdf]

## Support Information

### **Metabolite identification and pharmacokinetic study of Platycodi**

#### **Radix (Jiegeng) *in vivo***

Zhongyao Tang,<sup>a</sup> Yuanyuan Hou,<sup>\*a</sup> Xueyan Hu,<sup>a</sup> Aina Liu,<sup>a</sup> Leefong Yau,<sup>b</sup>

Tiantian Tong,<sup>b</sup> Zhihong Jiang,<sup>b</sup> and Gang Bai<sup>a</sup>

- a. State Key Laboratory of Medicinal Chemical Biology and College of Pharmacy, Tianjin Key Laboratory of Molecular Drug Research, Nankai University, Tianjin 300353, People's Republic of China.
- b. State Key Laboratory of Quality Research in Chinese Medicine, Macau Institute for Applied Research in Medicine and Health, Macau University of Science and Technology, Taipa, Macau, People's Republic of China.

\* Corresponding Author. Tel: 86-22-23506930. E-mail: houyy@nankai.edu.cn.

**Table S1 Main platycosides identified in total saponins by UPLC-Q/TOF-MS**

| Peak | Ret. Time (min) | Mode | MS (m/z)                     | MS/MS (m/z)                     | MW        | Formula                                          | Identification                  |
|------|-----------------|------|------------------------------|---------------------------------|-----------|--------------------------------------------------|---------------------------------|
| 1    | 11.73           | Pos  | 1255.6434 [M+H] <sup>+</sup> | 1255, 1123, 521                 | 1254.5881 | C <sub>58</sub> H <sub>94</sub> O <sub>29</sub>  | Deapioplatycodin D3             |
|      |                 | Neg  | 1253.5803 [M-H] <sup>-</sup> | 1253                            |           |                                                  |                                 |
| 2    | 11.83           | Pos  | 1093.5806 [M+H] <sup>+</sup> | 1093, 961, 683, 521             | 1092.5353 | C <sub>52</sub> H <sub>84</sub> O <sub>24</sub>  | Deapioplatycodin D              |
|      |                 | Neg  | 1091.5323 [M-H] <sup>-</sup> | 1901                            |           |                                                  |                                 |
| 3    | 11.93           | Pos  | 1297.6371 [M+H] <sup>+</sup> | 845, 683, 521                   | 1296.5986 | C <sub>60</sub> H <sub>96</sub> O <sub>30</sub>  | 2''-O-deapioacetylplatycodin D2 |
|      |                 | Neg  | 1295.9511 [M-H] <sup>-</sup> | 1295                            |           |                                                  |                                 |
| 4    | 12.12           | Pos  | 1387.6702 [M+H] <sup>+</sup> | 1387, 1255, 521                 | 1386.6303 | C <sub>63</sub> H <sub>102</sub> O <sub>33</sub> | Platycodin D3                   |
|      |                 | Neg  | 1385.6190 [M-H] <sup>-</sup> | 1385                            |           |                                                  |                                 |
| 5    | 12.22           | Pos  | 1225.6217 [M+H] <sup>+</sup> | 1225, 1093, 961, 683, 521       | 1224.5775 | C <sub>57</sub> H <sub>92</sub> O <sub>28</sub>  | Platycodin D                    |
|      |                 | Neg  | 1223.5737 [M-H] <sup>-</sup> | 1223                            |           |                                                  |                                 |
| 6    | 12.30           | Pos  | 1107.5664 [M+H] <sup>+</sup> | 1107, 975, 697, 535             | 1106.5145 | C <sub>52</sub> H <sub>82</sub> O <sub>25</sub>  | Platyconic acid C               |
|      |                 | Neg  | 1105.5062 [M-H] <sup>-</sup> | 1105                            |           |                                                  |                                 |
| 7    | 12.41           | Pos  | 1267.6388 [M+H] <sup>+</sup> | 1267, 1135, 1003, 683, 521      | 1266.5881 | C <sub>59</sub> H <sub>94</sub> O <sub>29</sub>  | Platycodin A                    |
|      |                 | Neg  | 1265.5782 [M-H] <sup>-</sup> | 1265                            |           |                                                  |                                 |
| 8    | 12.70           | Pos  | 1239.6040 [M+H] <sup>+</sup> | 975, 697, 535                   | 1238.5568 | C <sub>57</sub> H <sub>90</sub> O <sub>29</sub>  | Platyconic acid A               |
|      |                 | Neg  | 1237.5519 [M-H] <sup>-</sup> | 1237                            |           |                                                  |                                 |
| 9    | 12.88           | Pos  | 1281.6162 [M+H] <sup>+</sup> | 1149, 1017, 697 535             | 1280.5673 | C <sub>59</sub> H <sub>92</sub> O <sub>30</sub>  | Platyconic acid B               |
|      |                 | Neg  | 1279.5591 [M-H] <sup>-</sup> | 1279                            |           |                                                  |                                 |
| 10   | 13.32           | Pos  | 1429.7012 [M+H] <sup>+</sup> | 1429, 1297, 1165, 845, 683, 521 | 1428.6409 | C <sub>65</sub> H <sub>104</sub> O <sub>34</sub> | 2''-O-acetylplatycodin D2       |
|      |                 | Neg  | 1427.6244 [M-H] <sup>-</sup> | 1427                            |           |                                                  |                                 |
| 11   | 14.52           | Pos  | 845.4833 [M+H] <sup>+</sup>  | 845, 683, 521                   | 844.4457  | C <sub>42</sub> H <sub>68</sub> O <sub>17</sub>  | Platycoside K                   |

|    |       |     |                             |          |          |                                                 |                                                |
|----|-------|-----|-----------------------------|----------|----------|-------------------------------------------------|------------------------------------------------|
|    |       | Neg | 843.4387 [M-H] <sup>-</sup> | 843      |          |                                                 |                                                |
| 12 | 14.72 | Pos | 683.4249 [M+H] <sup>+</sup> | 683, 521 |          |                                                 |                                                |
|    |       | Neg | 681.3878 [M-H] <sup>-</sup> | 681      | 682.3928 | C <sub>36</sub> H <sub>58</sub> O <sub>12</sub> | 3- <i>O</i> -β-D-glucopyranosylplatycodigenin  |
| 13 | 15.43 | Pos | 697.4044 [M+H] <sup>+</sup> | 697, 535 |          |                                                 |                                                |
|    |       | Neg | 695.3668 [M-H] <sup>-</sup> | 695      | 696.3615 | C <sub>36</sub> H <sub>56</sub> O <sub>13</sub> | 3- <i>O</i> -β-D-glucopyranosylplatyconic acid |

---

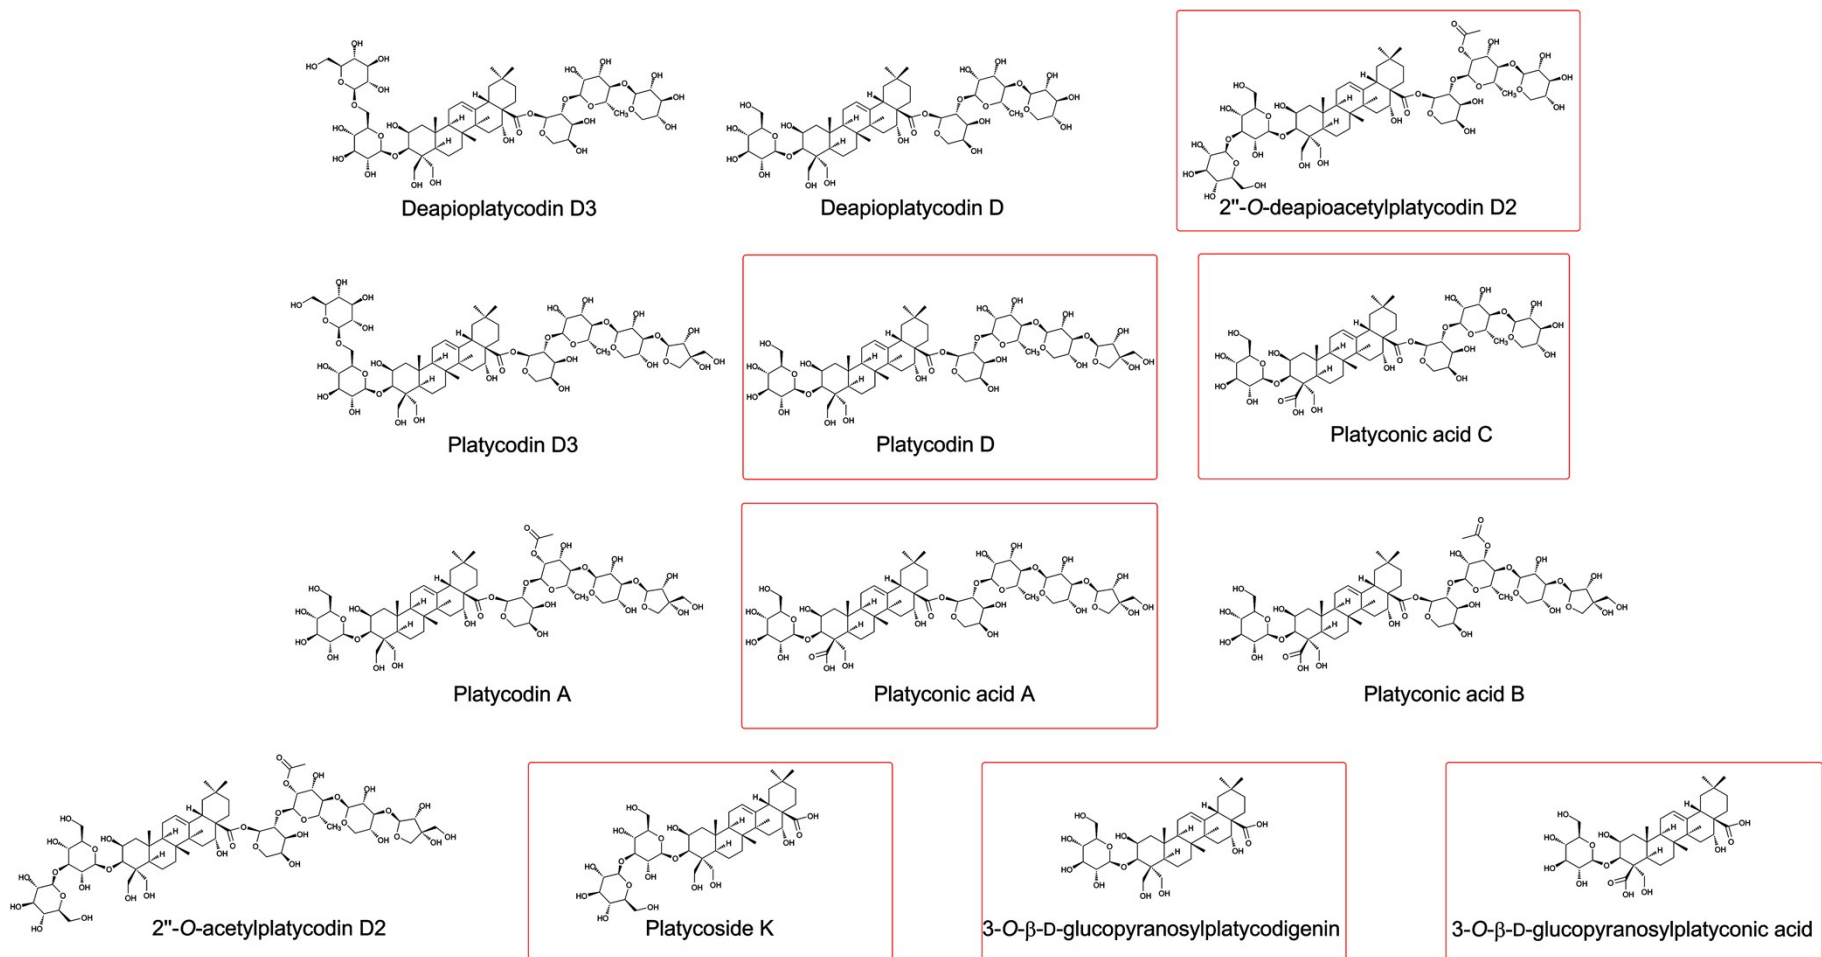

**Fig. S1 Structures of platycosides in total saponins (platycosides in plasma were marked by red frame).**

### Structure identification of GP

GP was an amorphous powder and its molecular formula was assigned to be  $C_{36}H_{58}O_{12}$  based on the high-resolution spectrum. The spectral features and physicochemical properties revealed it to be a triterpenoid saponin. The  $^1H$  NMR spectrum (pyridine- $d_5$ , 600 MHz) showed five tertiary methyl groups ( $\delta$  1.02, 1.06, 1.15, 1.51 and 1.78) and one olefinic proton ( $\delta$  5.67, br s). The  $^{13}C$  NMR spectrum (pyridine- $d_5$ , 600 MHz) showed five  $sp^3$  carbons at  $\delta$  17.57, 18.23, 24.70, 27.20 and 33.35, and two  $sp^2$  olefinic carbons at  $\delta$  122.71 and 145.05, and one carboxyl carbon at  $\delta$  180.06, and five oxygenated methene and methine carbons at  $\delta$  69.59, 86.15, 74.74, 65.03 and 63.58. The information of  $^1H$  and  $^{13}C$  NMR spectrum indicated that it possessed a 2,3,16,23,24-pentahydroxyolean-12-ene-28-oic acid as aglycon. The chemical shifts of C-3 ( $\delta$  86.15) and C-28 ( $\delta$  180.06) revealed that it was a monodesmosidic glycoside. On the basis of the above evidence and literature, GP was identified to be 3-*O*- $\beta$ -D-glucopyranosyl-2,3,16,23,24-pentahydroxyolean-12-ene-28-oic acid.

**Table S2 <sup>1</sup>H and <sup>13</sup>C NMR spectrum data ( $\delta$ ) of GP and GPA**

| Position | GP         |                 | Position | GPA        |                            |
|----------|------------|-----------------|----------|------------|----------------------------|
|          | $\delta_C$ | $\delta_H$      |          | $\delta_C$ | $\delta_H$                 |
| 1        | 45.06      |                 | 1        | 45.49      |                            |
| 2        | 69.59      | 4.73 (1H, m)    | 2        | 69.97      | 5.12 (1H,m)                |
| 3        | 86.15      | 4.61 (1H, m)    | 3        | 81.19      | 4.72 (1H, m)               |
| 4        | 47.17      |                 | 4        | 56.74      |                            |
| 5        | 48.11      |                 | 5        | 49.12      |                            |
| 6        | 19.23      |                 | 6        | 20.02      |                            |
| 7        | 33.67      |                 | 7        | 33.32      |                            |
| 8        | 40.24      |                 | 8        | 39.91      |                            |
| 9        | 47.67      |                 | 9        | 47.54      |                            |
| 10       | 37.54      |                 | 10       | 37.04      |                            |
| 11       | 24.17      |                 | 11       | 24.29      |                            |
| 12       | 122.71     | 5.67 (1H, br s) | 12       | 122.41     | 5.66 (1H, br s)            |
| 13       | 145.05     |                 | 13       | 145.30     |                            |
| 14       | 42.37      |                 | 14       | 42.26      |                            |
| 15       | 36.25      |                 | 15       | 36.22      |                            |
| 16       | 74.74      | 5.23 (1H, br s) | 16       | 74.72      | 5.24 (1H, br s)            |
| 17       | 48.95      |                 | 17       | 48.82      |                            |
| 18       | 41.60      |                 | 18       | 41.42      |                            |
| 19       | 46.47      |                 | 19       | 47.22      |                            |
| 20       | 31.07      |                 | 20       | 31.08      |                            |
| 21       | 36.07      |                 | 21       | 36.07      |                            |
| 22       | 32.90      |                 | 22       | 32.93      |                            |
| 23       | 63.58      |                 | 23       | 62.67      |                            |
| 24       | 65.03      |                 | 24       | 176.31     |                            |
| 25       | 18.23      | 1.51 (3H, s)    | 25       | 15.64      | 1.65 (3H, s)               |
| 26       | 17.57      | 1.06 (3H, s)    | 26       | 17.43      | 1.09 (3H, s)               |
| 27       | 27.20      | 1.78 (3H, s)    | 27       | 27.28      | 1.84 (3H, s)               |
| 28       | 180.06     |                 | 28       | 179.99     |                            |
| 29       | 33.35      | 1.02 (3H, s)    | 29       | 33.37      | 1.05 (3H, s)               |
| 30       | 24.70      | 1.15 (3H, s)    | 30       | 24.72      | 1.18 (3H, s)               |
| 1'       | 106.34     |                 | 1'       | 106.70     | 5.40 (1H, d. $J = 7.8$ Hz) |
| 2'       | 75.27      |                 | 2'       | 75.38      |                            |
| 3'       | 78.75      |                 | 3'       | 78.60      |                            |
| 4'       | 71.62      |                 | 4'       | 71.56      |                            |
| 5'       | 78.70      |                 | 5'       | 78.52      |                            |
| 6'       | 62.55      |                 | 6'       | 62.56      |                            |

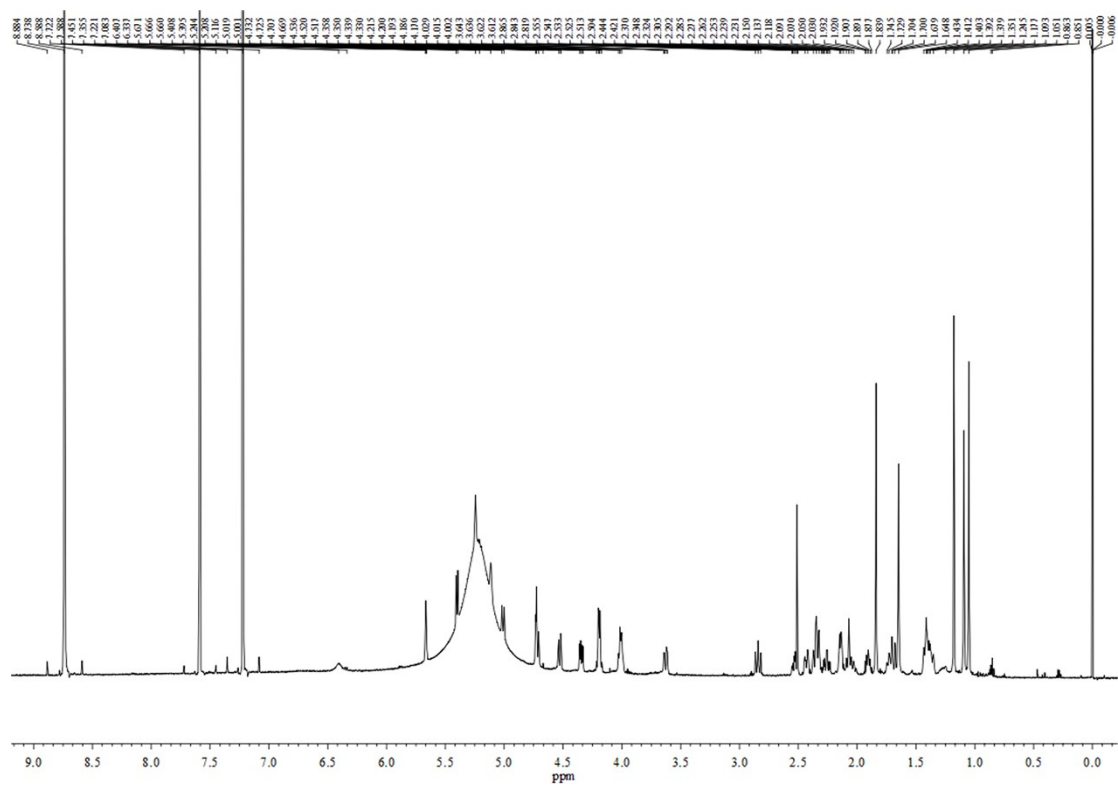

Fig. S2  $^1\text{H}$  NMR (pyridine- $d_5$ , 600 MHz) spectrum of GPA.

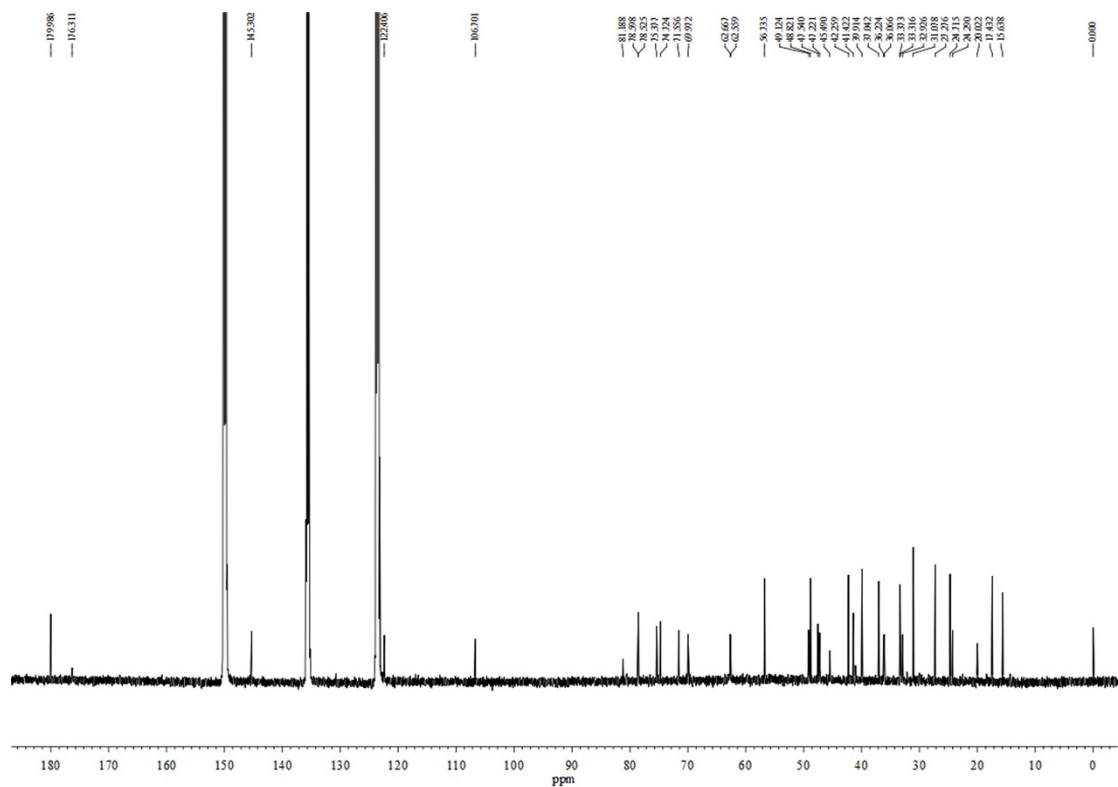

Fig. S3  $^{13}\text{C}$  NMR (pyridine- $d_5$ , 600 MHz) spectrum of GPA.

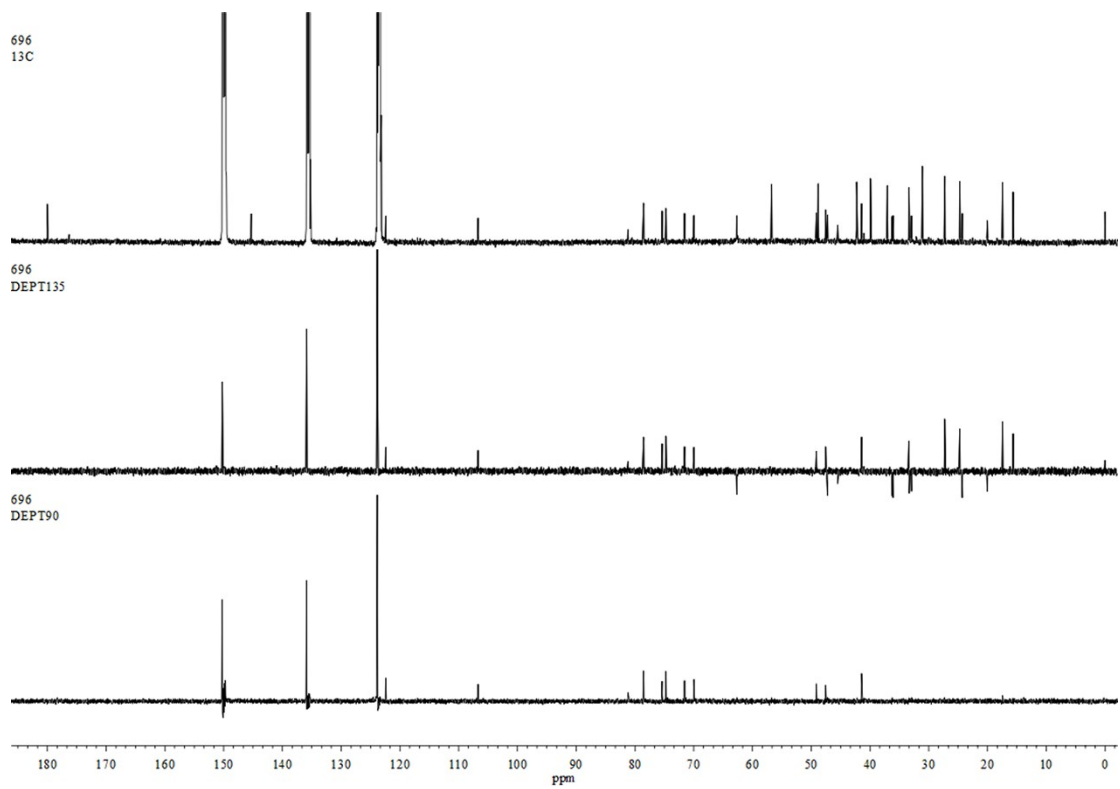

**Fig. S4 DEPT spectrum of GPA.**

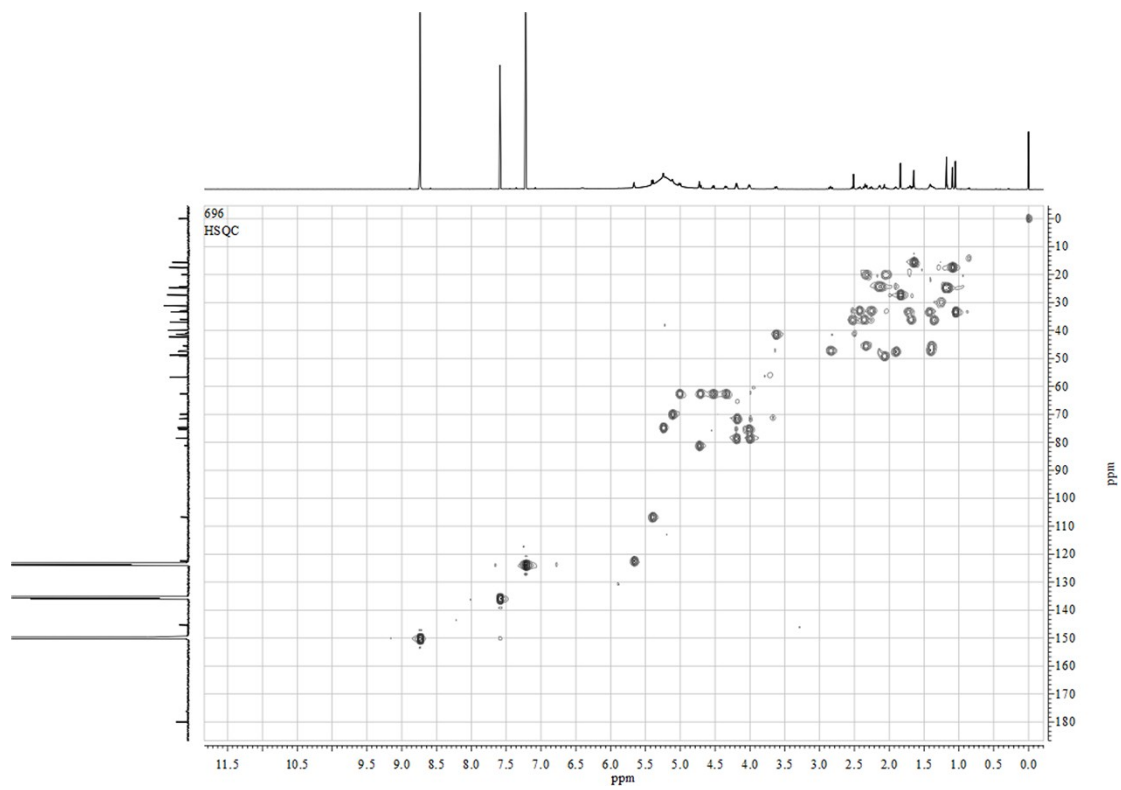

**Fig. S5 HSQC spectrum of GPA.**



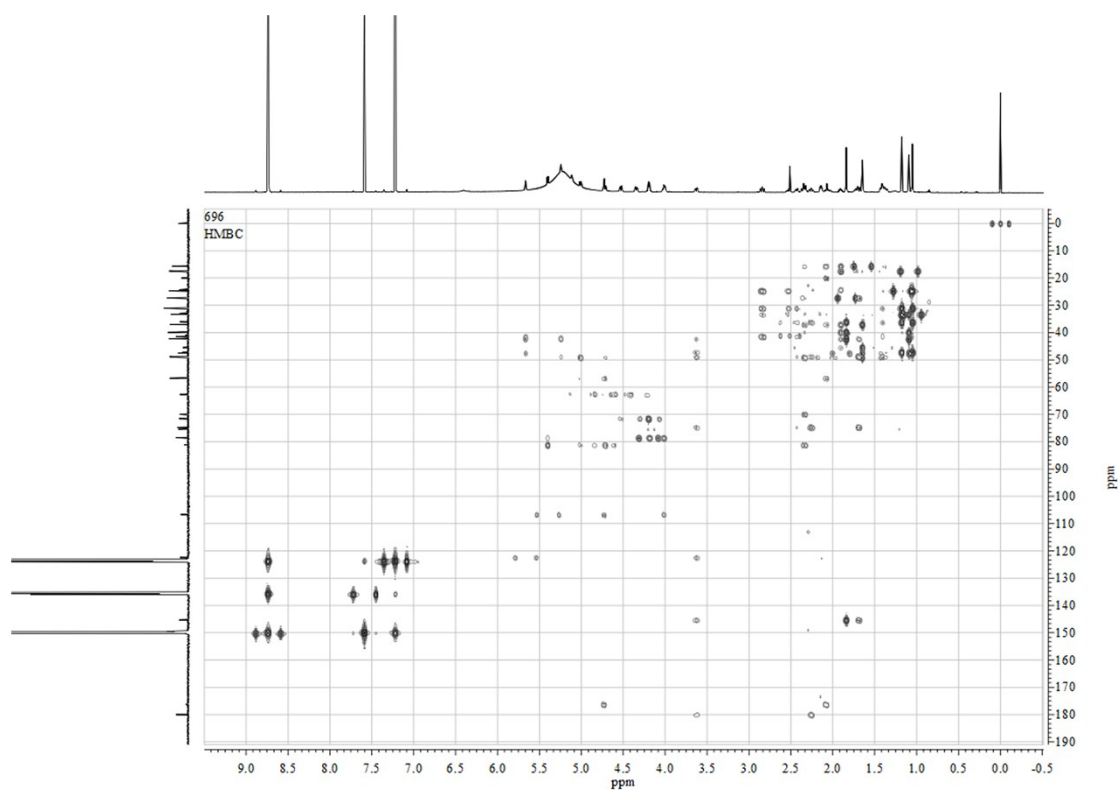

**Fig. S6 HMBC spectrum of GPA.**

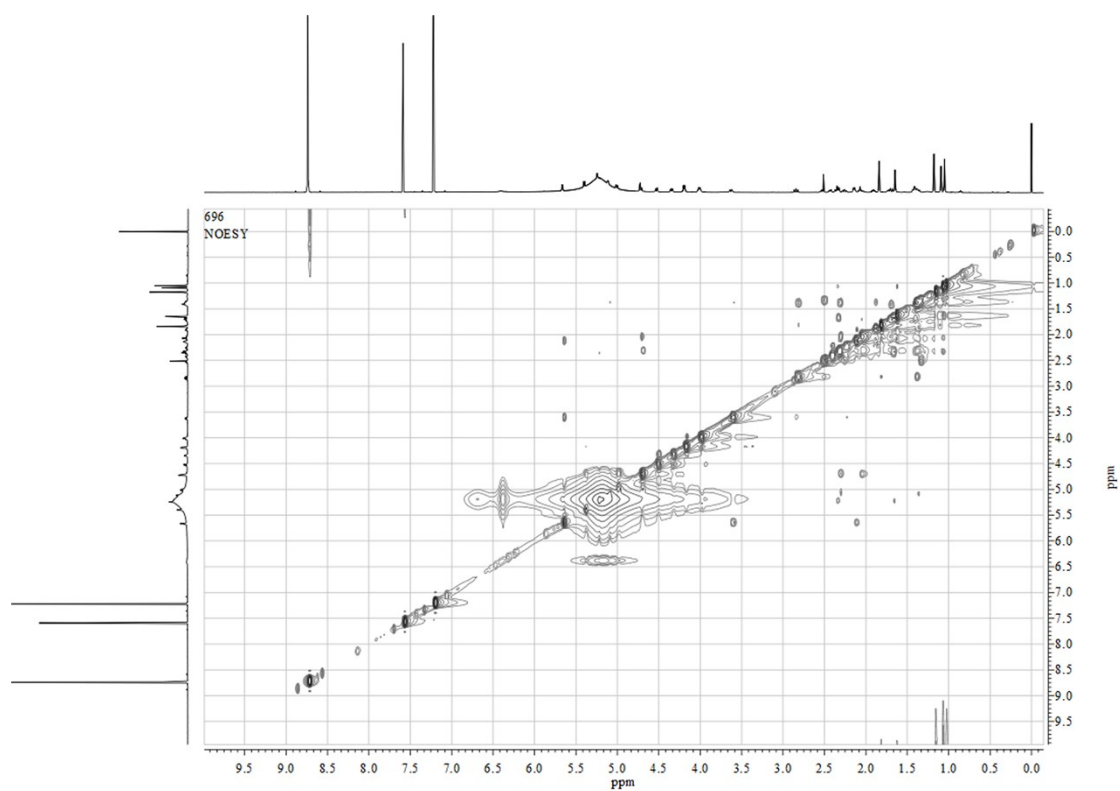

**Fig. S7 NOESY spectrum of GPA.**



**Table S3 Optimized MRM parameters for analytes and IS**

| Analytes | Mass     | Prec ion ( <i>m/z</i> ) | Prod ion ( <i>m/z</i> ) | CE (V) |
|----------|----------|-------------------------|-------------------------|--------|
| GP       | 682.3928 | 683.5                   | 485.5                   | 10     |
| GPA      | 696.3615 | 697.7                   | 517.4                   | 15     |
| IS       | 638.4394 | 603.3                   | 423.3                   | 9      |

**Table S4 Regression data and LLOQs of analytes in plasma samples.**

| Analytes | Range (µg/L) | Linear regression equation | <i>r</i> <sup>2</sup> | LLOQ (µg/L) |
|----------|--------------|----------------------------|-----------------------|-------------|
| GP       | 0.25-4940.00 | $y = 0.0064x - 0.0909$     | 0.9997                | 0.247       |
| GPA      | 0.25-4992.00 | $y = 0.0006x + 0.0035$     | 0.9995                | 0.250       |

**Table S5 Extraction recovery and matrix effect of analytes and IS in plasma samples (*n* = 3).**

| Analytes | Spiked concentration(µg/L) | Extraction recovery |         | Matrix effect |         |
|----------|----------------------------|---------------------|---------|---------------|---------|
|          |                            | Mean± SD (%)        | RSD (%) | Mean± SD (%)  | RSD (%) |
| GP       | 2.47                       | 95.41±3.71          | 3.88    | 107.76±3.89   | 3.61    |
|          | 247.00                     | 94.06±2.10          | 2.24    | 101.91±1.83   | 1.79    |
|          | 2470.00                    | 98.53±1.41          | 1.43    | 107.05±0.92   | 0.86    |
| GPA      | 2.50                       | 96.57±1.13          | 1.17    | 102.09±2.94   | 2.88    |
|          | 249.60                     | 95.87±2.26          | 2.36    | 94.95±1.50    | 1.58    |
| IS       | 2496.00                    | 94.90±5.35          | 5.35    | 98.11±8.06    | 8.22    |
|          | 500.00                     | 98.03±1.83          | 1.87    | 97.32±4.42    | 4.54    |

**Table S6 Stability of f analytes and IS in plasma samples (mean ± SD, *n* = 3).**

| Analytes | Conc. (µg/L) | Room temperature 24 h |          | Auto-sampler 24 h |          | Freeze-thraw cycles |          | -20 °C 14 days |          |
|----------|--------------|-----------------------|----------|-------------------|----------|---------------------|----------|----------------|----------|
|          |              | Precision             | Accuracy | Precision         | Accuracy | Precision           | Accuracy | Precision      | Accuracy |
|          |              | (%)                   | (%)      | (%)               | (%)      | (%)                 | (%)      | (%)            | (%)      |
| GP       | 2.47         | 2.27                  | -11.37   | 1.11              | 2.26     | 0.44                | -8.4     | 1.89           | 6.61     |
|          | 247.00       | 0.34                  | -2.64    | 2.25              | 0.37     | 1.11                | 0.98     | 1.84           | 3.27     |
|          | 2470.00      | 3.06                  | 3.61     | 2.67              | -0.38    | 4.84                | -1.01    | 3.83           | -4.3     |
| GPA      | 2.50         | 3.55                  | 1.72     | 6.59              | 2.4      | 0.39                | 1.31     | 2.66           | -7.49    |
|          | 249.60       | 3.97                  | -3       | 4.74              | -2.83    | 3.67                | 2.56     | 3.61           | -1.2     |
|          | 2496.00      | 1.08                  | 2.42     | 2.03              | -0.6     | 1.32                | -5.93    | 2.77           | 5.82     |
